# Supplementary material for: Combined Effect of Light and Temperature on the Production of Saxitoxins in Cylindrospermopsis raciborskii Strains
Source: PubMed Central journal article supplement (PMC6356899; doi:10.3390/toxins11010038), 2019-01-14
Supplement: toxins-11-00038-s001.pdf [file toxins-11-00038-s001.pdf]

## Supplementary Materials: Combined Effect of Light and Temperature on the Production of Saxitoxins in *Cylindrospermopsis raciborskii* Strains

Marcella C. B. Mesquita, Miquel Lüring, Fabiane Dorr, Ernani Pinto, and Marcelo M. Marinho

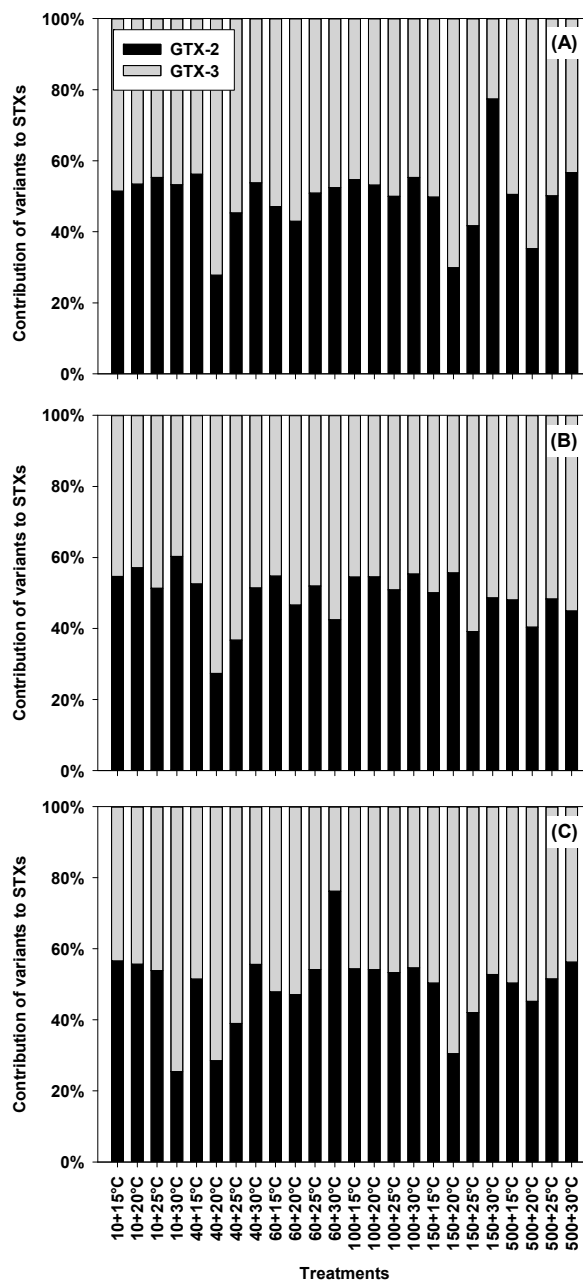

**Figure S1.** Contribution of two saxitoxins variants (STXs) in 24 treatments combining different light and temperature conditions in three *C. raciborskii* strains. CYLCAM-01 (A), CYLCAM-02 (B) and CYLCAM-03 (C). Light intensities ( $\mu\text{mol}$  of photons  $\text{m}^{-2} \text{s}^{-1}$ ) = 10, 40, 60, 100, 150 and 500. Temperatures = 15, 20, 25 and 30 °C.
